# Supplementary material for: Tuning the size of quantum dots to enhance charge transfer and photocatalytic CO2 reduction
Source: Royal Society of Chemistry journal article supplement (doi:10.1039/d5ra08597g), 2026-04-13
Supplement: d5ra08597g1.pdf [file d5ra08597g1.pdf]

## Supporting Information

### Tuning Quantum Dots Size to Enhance Charge Transfer and Photocatalytic CO<sub>2</sub> Reduction

Muhammad Adnan Khalid<sup>1,2</sup>, Muhammad Mubeen<sup>1</sup>, Muhammad Nasir Hussain<sup>1</sup>, Maria Mukhtar<sup>1</sup>, Amna Iqbal<sup>1</sup>, Sergey A. Kovalenko<sup>2</sup>, Samuel Palato<sup>2</sup>, Baljinder K. Kandola<sup>3</sup>, Azhar Iqbal<sup>1,3\*</sup>

<sup>1</sup>Department of Chemistry, Quaid-I-Azam University Islamabad-45320, Pakistan

<sup>2</sup>Institute of Chemistry, Humboldt University of zu Berlin, 12489 Berlin, Germany

<sup>3</sup>Institute for Materials Research and Innovation, University of Greater Manchester, Bolton, BL3 5AB, United Kingdom

\*Correspondence should be addressed to Dr. Azhar Iqbal, Email, [aiqbal@qau.edu.pk](mailto:aiqbal@qau.edu.pk)

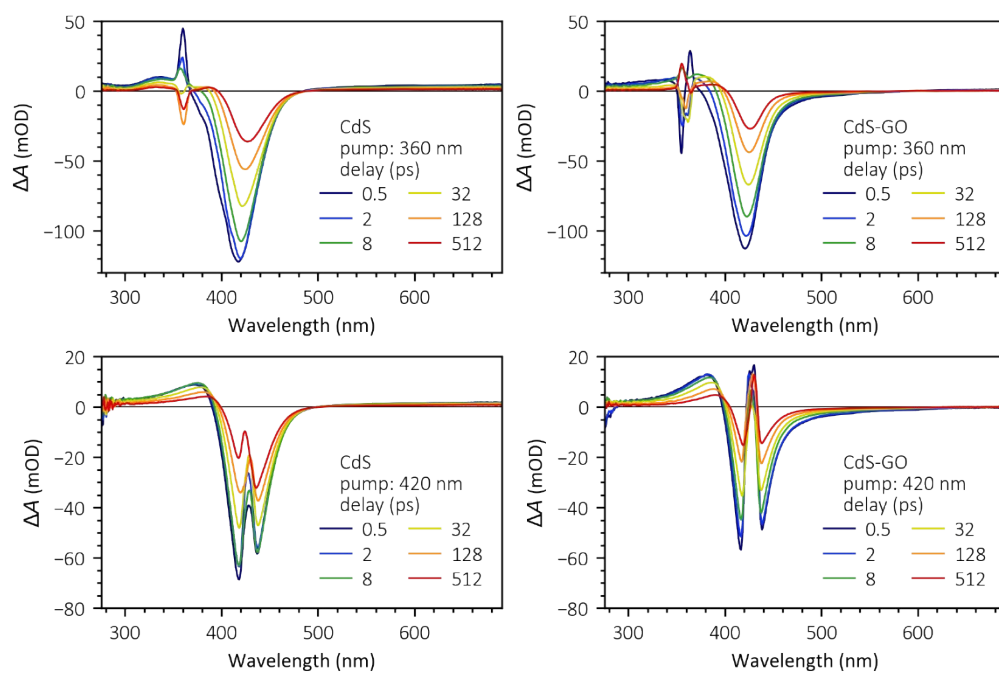

**Figure S1:** Comparison of TA data: excitation wavelengths (top row) 360 nm and (bottom row) 420 nm, for samples (left) CdS (right) CdS GO.
